# Supplementary material
Source: publisher site journal article supplement (doi:10.18632/aging.204283)
Supplement: Supplementary file 1 [file aging-v14-204283-supplementary-material-SD1.pdf]

## SUPPLEMENTARY FIGURE

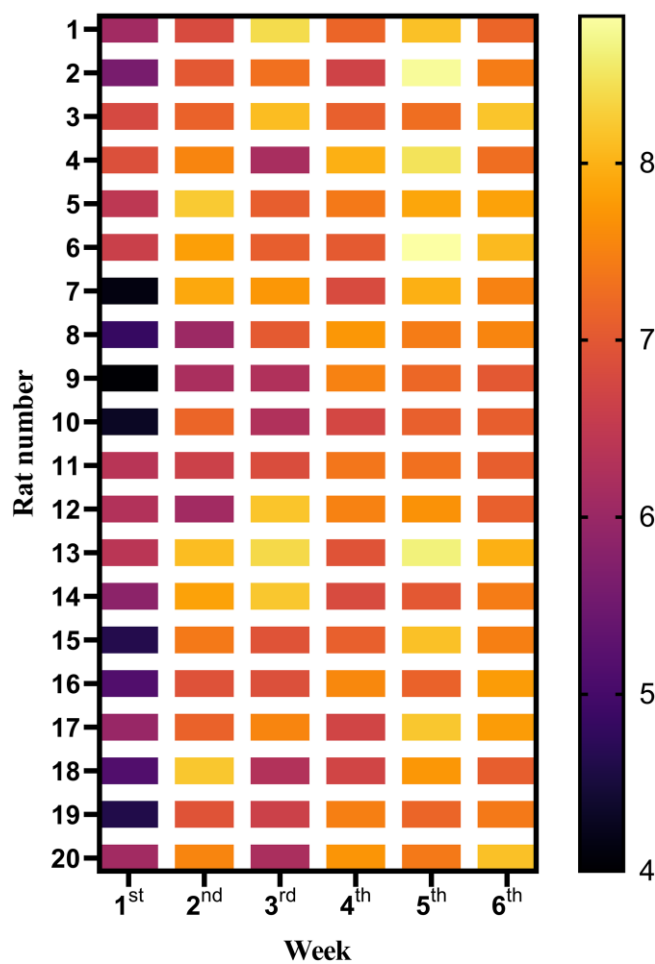

**Supplementary Figure 1.** The figure shows the data chart of apomorphine rotation test every week from the 1st to 6th week after surgery. If at least one experimental result exceeded 7 rotations/min, the model is considered successful. After verification, all 20 PD rat models are successful.
