# Supplementary material
Source: publisher site journal article supplement (doi:10.18632/aging.204283)
Supplement: Supplementary file 2 [file aging-v14-204283-supplementary-material-SD2.pdf]

## SUPPLEMENTARY TABLE

Supplementary Table 1. Comparison of changes of FA and T2\* value before and after surgery.

|     | Site          | Week            | t     | p value |
|-----|---------------|-----------------|-------|---------|
| FA  | Ipsilateral   | 1 <sup>st</sup> | 3.806 | 0.001*  |
|     |               | 2 <sup>nd</sup> | 3.523 | 0.002*  |
|     |               | 3 <sup>rd</sup> | 1.416 | 0.173   |
|     |               | 4 <sup>th</sup> | 0.013 | 0.990   |
|     |               | 5 <sup>th</sup> | 3.545 | 0.002*  |
|     |               | 6 <sup>th</sup> | 5.775 | <0.001* |
|     | Contralateral | 1 <sup>st</sup> | 0.599 | 0.556   |
|     |               | 2 <sup>nd</sup> | 0.173 | 0.864   |
|     |               | 3 <sup>rd</sup> | 0.264 | 0.795   |
|     |               | 4 <sup>th</sup> | 0.637 | 0.532   |
|     |               | 5 <sup>th</sup> | 0.480 | 0.636   |
|     |               | 6 <sup>th</sup> | 0.409 | 0.687   |
| T2* | Ipsilateral   | 1 <sup>st</sup> | 0.248 | 0.807   |
|     |               | 2 <sup>nd</sup> | 1.195 | 0.247   |
|     |               | 3 <sup>rd</sup> | 1.993 | 0.061   |
|     |               | 4 <sup>th</sup> | 0.819 | 0.423   |
|     |               | 5 <sup>th</sup> | 5.987 | <0.001* |
|     |               | 6 <sup>th</sup> | 7.261 | <0.001* |
|     | Contralateral | 1 <sup>st</sup> | 0.534 | 0.599   |
|     |               | 2 <sup>nd</sup> | 0.516 | 0.612   |
|     |               | 3 <sup>rd</sup> | 1.100 | 0.285   |
|     |               | 4 <sup>th</sup> | 1.577 | 0.131   |
|     |               | 5 <sup>th</sup> | 0.333 | 0.743   |
|     |               | 6 <sup>th</sup> | 0.500 | 0.623   |

p\* value is less than 0.05, which means there is a statistical difference.
